# Supplementary material
Source: HighWire-hosted journal article supplement (https://www.cmaj.ca/highwire/filestream/59165/field_highwire_adjunct_files/2/lung-liu-3-at.pdf)
Supplement: lung-liu-3-at.pdf [file lung-liu-3-at.pdf]

### Appendix 3 (as supplied by the authors): GRADE evidence profile

| Quality assessment         |                   |                         |                          |                         |                        |                      | No of patients       |                       | Effect                    |                                               | Quality*         | Importance |
|----------------------------|-------------------|-------------------------|--------------------------|-------------------------|------------------------|----------------------|----------------------|-----------------------|---------------------------|-----------------------------------------------|------------------|------------|
| No of studies              | Design            | Risk of bias            | Inconsistency            | Indirectness            | Imprecision            | Other considerations | Lower V <sub>T</sub> | Higher V <sub>T</sub> | Relative (95% CI)         | Absolute                                      |                  |            |
| <b>Lung injury</b>         |                   |                         |                          |                         |                        |                      |                      |                       |                           |                                               |                  |            |
| 8                          | randomised trials | no serious risk of bias | no serious inconsistency | no serious indirectness | serious <sup>1</sup>   | none                 | 8/441<br>(1.8%)      | 24/424<br>(5.7%)      | RR 0.36<br>(0.17 to 0.78) | 36 fewer per 1000 (from 12 fewer to 47 fewer) | ⊕⊕⊕○<br>MODERATE | CRITICAL   |
|                            |                   |                         |                          |                         |                        |                      |                      | 4%                    |                           | 26 fewer per 1000 (from 9 fewer to 33 fewer)  |                  |            |
| <b>Pulmonary infection</b> |                   |                         |                          |                         |                        |                      |                      |                       |                           |                                               |                  |            |
| 7                          | randomised trials | no serious risk of bias | no serious inconsistency | no serious indirectness | no serious imprecision | none                 | 17/425<br>(4%)       | 42/408<br>(10.3%)     | RR 0.46<br>(0.26 to 0.83) | 56 fewer per 1000 (from 18 fewer to 76 fewer) | ⊕⊕⊕⊕<br>HIGH     | CRITICAL   |
|                            |                   |                         |                          |                         |                        |                      |                      | 8%                    |                           | 43 fewer per 1000 (from 14 fewer to 59 fewer) |                  |            |
| <b>Atelectasis</b>         |                   |                         |                          |                         |                        |                      |                      |                       |                           |                                               |                  |            |
| 7                          | randomised trials | no serious risk of bias | serious <sup>2</sup>     | no serious indirectness | serious <sup>3</sup>   | none                 | 31/352<br>(8.8%)     | 56/338<br>(16.6%)     | RR 0.69<br>(0.35 to 1.38) | 51 fewer per 1000 (from 108 fewer to 63 more) | ⊕⊕○○<br>LOW      | IMPORTANT  |
|                            |                   |                         |                          |                         |                        |                      |                      | 17%                   |                           | 53 fewer per 1000 (from 111 fewer to 65 more) |                  |            |
| <b>Mortality</b>           |                   |                         |                          |                         |                        |                      |                      |                       |                           |                                               |                  |            |
| 13                         | randomised trials | no serious risk of bias | no serious inconsistency | no serious indirectness | no serious imprecision | none                 | 13/591<br>(2.2%)     | 18/572<br>(3.1%)      | RR 0.75<br>(0.38 to 1.49) | 8 fewer per 1000 (from 20 fewer to 15 more)   | ⊕⊕⊕⊕<br>HIGH     | IMPORTANT  |
|                            |                   |                         |                          |                         |                        |                      |                      | 2%                    |                           | 5 fewer per 1000 (from 12 fewer to 10 more)   |                  |            |

| Length of hospital stay (Better indicated by lower values)            |                   |                         |                           |                         |                        |      |     |     |   |                                             |                  |               |
|-----------------------------------------------------------------------|-------------------|-------------------------|---------------------------|-------------------------|------------------------|------|-----|-----|---|---------------------------------------------|------------------|---------------|
| 6                                                                     | randomised trials | no serious risk of bias | serious <sup>4</sup>      | no serious indirectness | no serious imprecision | none | 343 | 343 | - | SMD 0.15 lower (0.42 lower to 0.12 higher)  | ⊕⊕⊕○<br>MODERATE | NOT IMPORTANT |
| Length of ICU stay (Better indicated by lower values)                 |                   |                         |                           |                         |                        |      |     |     |   |                                             |                  |               |
| 4                                                                     | randomised trials | no serious risk of bias | very serious <sup>5</sup> | no serious indirectness | no serious imprecision | none | 322 | 323 | - | SMD 0.06 higher (0.33 lower to 0.45 higher) | ⊕⊕○○<br>LOW      | NOT IMPORTANT |
| PaO <sub>2</sub> /FiO <sub>2</sub> (Better indicated by lower values) |                   |                         |                           |                         |                        |      |     |     |   |                                             |                  |               |
| 9                                                                     | randomised trials | serious <sup>6</sup>    | serious <sup>7</sup>      | no serious indirectness | no serious imprecision | none | 219 | 219 | - | SMD 0.06 lower (0.39 lower to 0.26 higher)  | ⊕⊕○○<br>LOW      | IMPORTANT     |
| PaCO <sub>2</sub> (Better indicated by lower values)                  |                   |                         |                           |                         |                        |      |     |     |   |                                             |                  |               |
| 14                                                                    | randomised trials | serious <sup>6</sup>    | serious <sup>8</sup>      | no serious indirectness | no serious imprecision | none | 366 | 370 | - | SMD 0.49 higher (0.19 to 0.78 higher)       | ⊕⊕○○<br>LOW      | IMPORTANT     |

Note: FiO<sub>2</sub> = fraction of inspired oxygen, ICU = intensive care unit, PaCO<sub>2</sub> = arterial partial pressure of carbon dioxide, PaO<sub>2</sub> = arterial partial pressure of oxygen, V<sub>T</sub> = tidal volumes.

<sup>1</sup> RR with 95% CI for one trial was 3.06 (0.13-73.35).

<sup>2</sup> Significant heterogeneity (I<sub>2</sub> = 59%) was found.

<sup>3</sup> RR with 95% CI for one trial was 3.00 (0.13-67.51).

<sup>4</sup> Significant heterogeneity (I<sub>2</sub> = 53%) was found.

<sup>5</sup> Significant heterogeneity (I<sub>2</sub> = 78%) was found.

<sup>6</sup> Most trials were judged to be at unclear risk of bias.

<sup>7</sup> Significant heterogeneity (I<sub>2</sub> = 60%) was found.

<sup>8</sup> Significant heterogeneity (I<sub>2</sub> = 65%) was found.

\*GRADE Working Group grades of evidence: high quality = further research is very unlikely to change our confidence in the estimate of effect; moderate quality = further research is likely to have an important impact on our confidence in the estimate of effect and may change the estimate; low quality = further research is very likely to have an important impact on our confidence in the estimate of effect and is likely to change the estimate; very low quality = we are very uncertain about the estimate.
